# Supplementary material
Source: MDPI journal article supplement (https://www.mdpi.com/2073-4352/12/12/1778)
Supplement: s1 [file s1]

## Support information

# The Effect of Nb<sub>2</sub>O<sub>5</sub> Precursor on KNN-Based Ceramics' Piezoelectricity and Strain Temperature Stability

Ruilin Han, Tingting Gao, Yining Xie, Lixu Xie, Yuan Cheng, Xu Li, Hao Chen, Jie Xing \* and Jianguo Zhu \*

College of Materials Science and Engineering, Sichuan University, Chengdu 610064, China

\* Correspondence: xingjie@scu.edu.cn (J.X.); nic0400@scu.edu.cn (J.Z.)

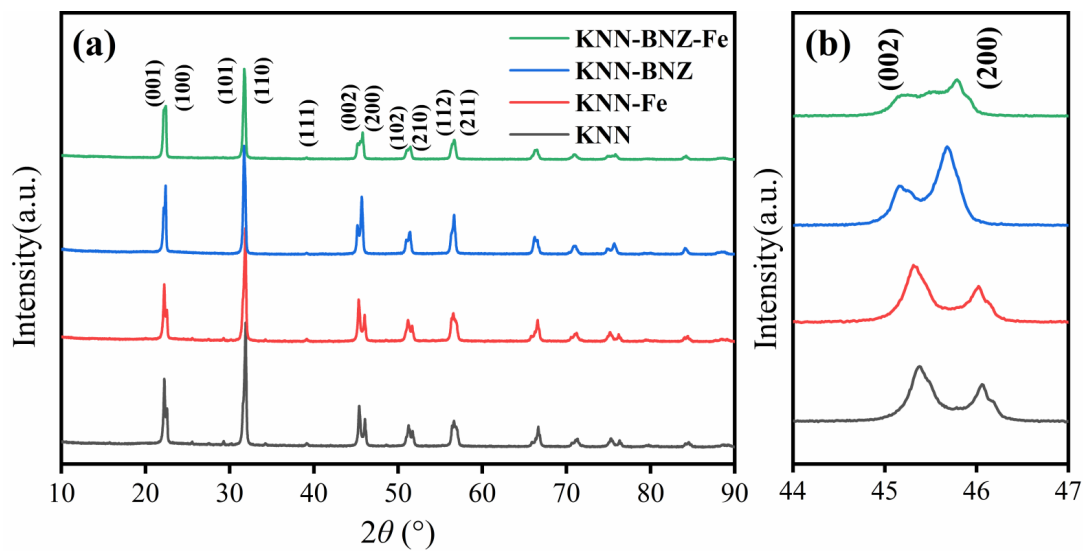

**Figure S1** XRD patterns of KNN, KNN-Fe, KNN-BNZ, KNN-BNZ-Fe and KNN-UN from (a)  $20^\circ < \theta < 90^\circ$ , (b)  $44^\circ < \theta < 47^\circ$

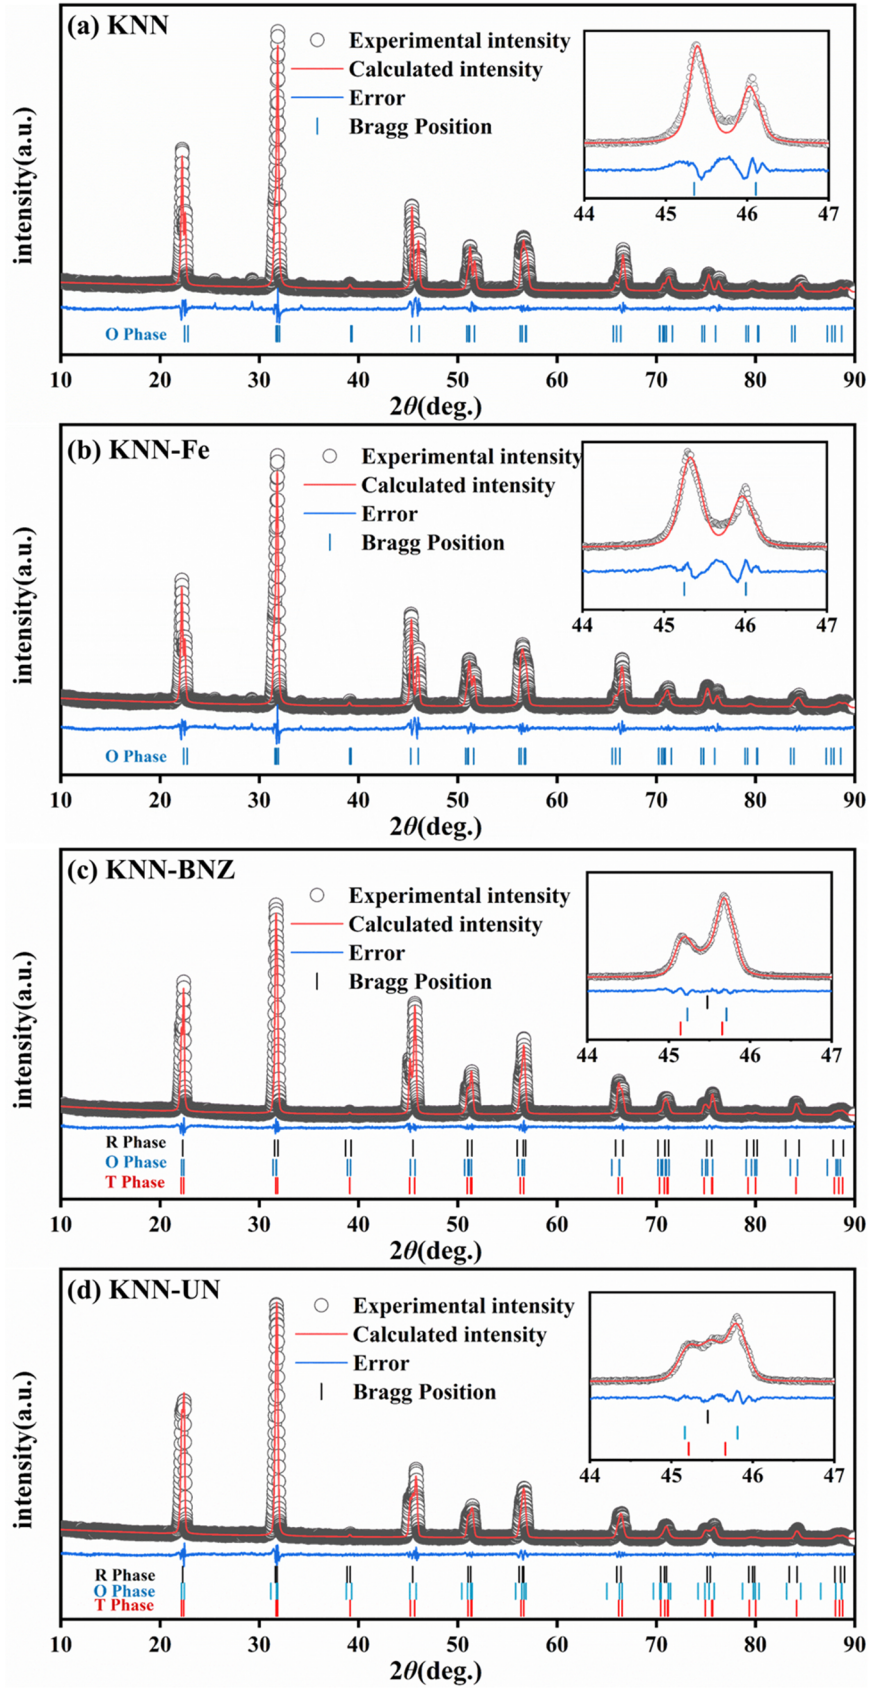

**Figure S2** (a)-(d) The Rietveld refinement for KNN, KNN-Fe, KNN-BNZ, KNN-UN ceramics

**Table S1** Parameters of KNN, KNN-Fe, KNN-BNZ and KNN-UN ceramics obtained from Rietveld refinement

| Parameters  | KNN         | KNN-Fe      | KNN-BNZ    |             |             |            | KNN-UN      |             |
|-------------|-------------|-------------|------------|-------------|-------------|------------|-------------|-------------|
| sig         | 1.98        | 1.99        |            | 1.88        |             |            | 1.52        |             |
| $R_w(\%)$   | 4.38        | 4.93        |            | 3.96        |             |            | 4.06        |             |
| Symmetry    | O Phase     | O Phase     | R Phase    | O Phase     | T Phase     | R Phase    | O Phase     | T Phase     |
| proportion  | 100%        | 100%        | 34.2%      | 29.8%       | 36.0%       | 33.5%      | 46.7%       | 19.8%       |
| Space group | <i>Amm2</i> | <i>Amm2</i> | <i>R3m</i> | <i>Amm2</i> | <i>P4mm</i> | <i>R3m</i> | <i>Amm2</i> | <i>P4mm</i> |
| a(Å)        | 3.9399      | 3.9931      | 3.9863     | 3.9667      | 3.9709      | 3.9885     | 3.9581      | 3.9704      |
| b(Å)        | 5.6634      | 5.6630      | 3.9863     | 5.6957      | 3.9709      | 3.9885     | 5.7336      | 3.9704      |
| c(Å)        | 5.6292      | 5.6281      | 3.9863     | 5.6367      | 4.0136      | 3.9885     | 5.6151      | 4.0077      |
| Alpha(°)    | 90.0000     | 90.0000     | 89.4240    | 90.0000     | 90.0000     | 89.6780    | 90.0000     | 90.0000     |
|             | 0.0000,     | 0.0000,     | 0.0134,    | -0.0002,    | 0.0000,     | 0.0129,    | 0.0000,     | 0.0000,     |
| A (x,y,z)   | 0.0000,     | 0.0000,     | 0.0134,    | -0.0001,    | 0.0000,     | 0.0129,    | 0.0001,     | 0.0000,     |
|             | 0.0138      | 0.0138      | 0.0134     | 0.0135      | 0.0177      | 0.0129     | 0.0137      | 0.0178      |
|             | 0.5001,     | 0.5002,     | 0.4922,    | 0.5002,     | 0.5000,     | 0.4949,    | 0.5000,     | 0.5000,     |
| B (x,y,z)   | 0.0000,     | 0.0000,     | 0.4922,    | 0.0002,     | 0.5000,     | 0.4949,    | 0.0000,     | 0.5000,     |
|             | 0.4998      | 0.4993      | 0.4922     | 0.4923      | 0.4922      | 0.4949     | 0.4949      | 0.4950      |
|             | 0.0000,     | 0.0000,     | 0.5217,    | 0.0002,     | 0.5000,     | 0.5247,    | 0.0000,     | 0.4998,     |
| O1 (x,y,z)  | 0.0000,     | 0.0000,     | 0.5217,    | 0.0000,     | 0.5000,     | 0.5247,    | -0.0001     | 0.4995,     |
|             | 0.5361      | 0.5358      | 0.0321     | 0.5278      | 0.0433      | 0.0324     | 0.5309      | 0.0434      |
|             | 0.5000,     | 0.4997,     |            | 0.4916,     | 0.5000,     |            | 0.4997,     | 0.4999,     |
| O2 (x,y,z)  | 0.2476,     | 0.2470,     | -          | 0.2434,     | 0.0000,     | -          | 0.2449,     | -0.0026     |
|             | 0.2841      | 0.2820      |            | 0.2794      | 0.5316      |            | 0.2812      | 0.5345      |

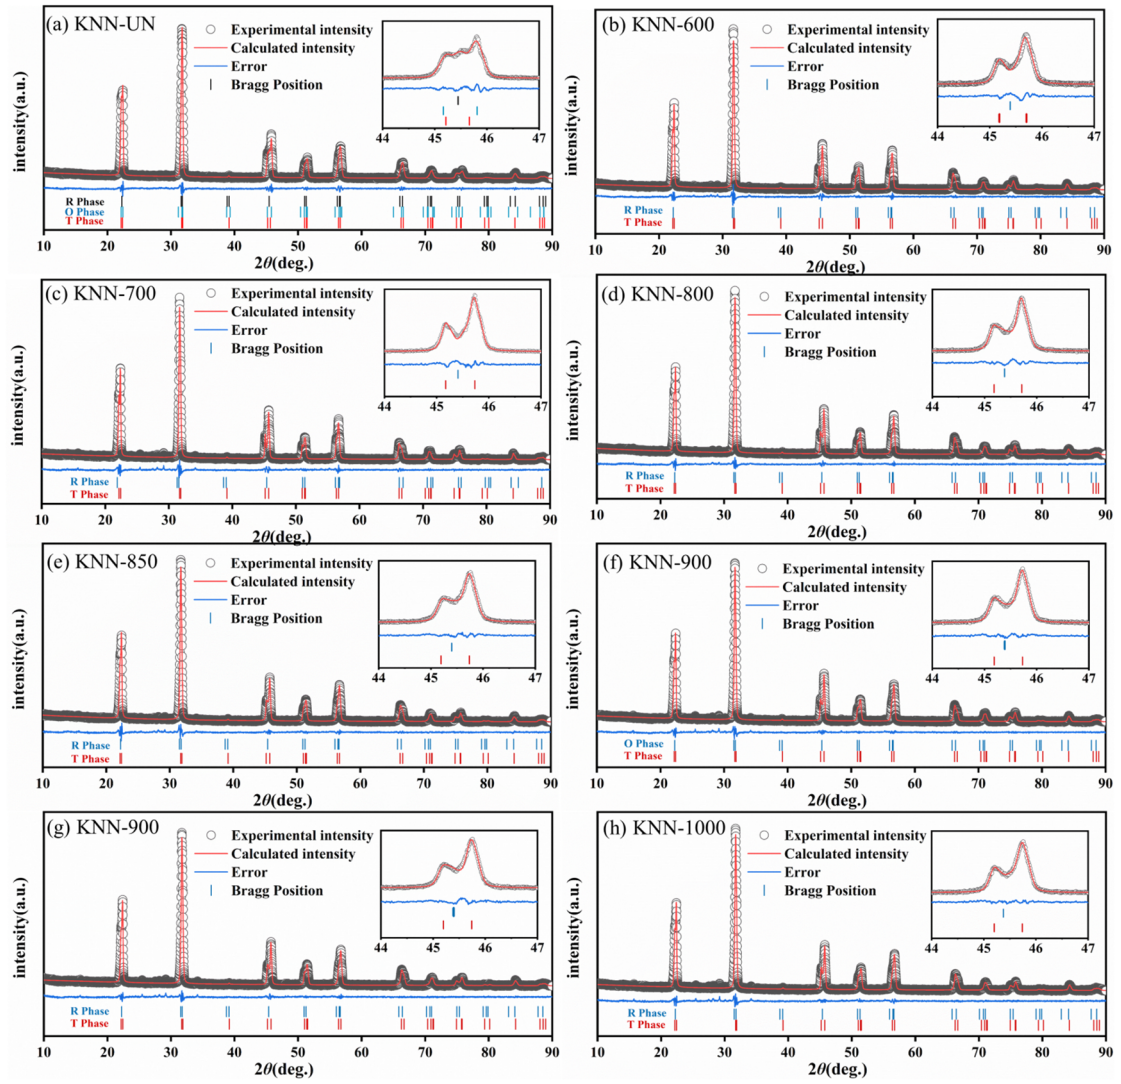

**Figure S3** (a)-(h) The Rietveld refinement for KNN-UN, KNN-600, KNN-700, KNN-800, KNN-850, KNN-900, KNN-950, KNN-1000



**Table S2** Parameters of KNN-UN ~ KNN-1000 obtained from Rietveld refinement

| Parameter   |            | KNN-UN      |             | KNN-600    |             | KNN-700    |             | KNN-800    |             | KNN-850    |             | KNN-900    |             | KNN-950    |             | KNN-1000   |             |
|-------------|------------|-------------|-------------|------------|-------------|------------|-------------|------------|-------------|------------|-------------|------------|-------------|------------|-------------|------------|-------------|
| s           |            |             |             |            |             |            |             |            |             |            |             |            |             |            |             |            |             |
| sig         |            | 1.52        |             | 1.61       |             | 1.70       |             | 1.58       |             | 1.59       |             | 1.65       |             | 1.60       |             | 1.70       |             |
| $R_w(\%)$   |            | 4.06        |             | 4.34       |             | 4.54       |             | 4.23       |             | 4.27       |             | 4.41       |             | 4.49       |             | 4.55       |             |
| Symmetry    | R Phase    | O Phase     | T Phase     | R Phase    | T Phase     | R Phase    | T Phase     | R Phase    | T Phase     | R Phase    | T Phase     | R Phase    | T Phase     | R Phase    | T Phase     | R Phase    | T Phase     |
| proportion  | 33.5%      | 46.7%       | 19.8%       | 39.4%      | 60.6%       | 41.3%      | 58.7%       | 47.4%      | 52.6%       | 48.7%      | 51.3%       | 46.9%      | 53.1%       | 44.9%      | 55.1%       | 43.8%      | 56.2%       |
| Space group | <i>R3m</i> | <i>Amm2</i> | <i>P4mm</i> | <i>R3m</i> | <i>P4mm</i> |
| a(Å)        | 3.9885     | 3.9581      | 3.9704      | 3.9931     | 3.9671      | 3.9343     | 3.9648      | 3.9937     | 3.9664      | 3.9926     | 3.9644      | 3.9934     | 3.9650      | 3.9929     | 3.9641      | 3.9944     | 3.9642      |
| b(Å)        | 3.9885     | 5.7336      | 3.9704      | 3.9931     | 3.9671      | 3.9343     | 3.9648      | 3.9937     | 3.9664      | 3.9926     | 3.9644      | 3.9934     | 3.9650      | 3.9929     | 3.9641      | 3.9944     | 3.9642      |
| c(Å)        | 3.9885     | 5.6151      | 4.0077      | 3.9931     | 4.0102      | 3.9343     | 4.0111      | 3.9937     | 4.0104      | 3.9926     | 4.0094      | 3.9934     | 4.0101      | 3.9929     | 4.0090      | 3.9944     | 4.0088      |
| Alpha(°)    | 89.6780    | 90.0000     | 90.0000     | 89.6165    | 90.0000     | 89.5387    | 90.0000     | 89.5922    | 90.0000     | 89.5541    | 90.0000     | 89.5871    | 90.0000     | 89.5808    | 90.000      | 89.5114    | 90.000      |
| A (x,y,z)   | 0.0129,    | 0.0000,     | 0.0000,     | 0.0129,    | 0.0000,     | 0.0133,    | 0.0000,     | 0.0135,    | 0.0000,     | 0.0129,    | 0.0003      | 0.0133,    | 0.0000,     | 0.0134,    | 0.0001,     | 0.0133,    | 0.0001      |
|             | 0.0129,    | 0.0001,     | 0.0000,     | 0.0129,    | -0.0002     | 0.0133,    | -0.0002     | 0.0135,    | -0.000,     | 0.0129,    | -0.0002     | 0.0133,    | -0.0002     | 0.0134,    | -0.0002     | 0.0133,    | 0.0002      |
|             | 0.0129     | 0.0137      | 0.0178      | 0.0129     | 0.0179      | 0.0133     | 0.0175      | 0.0135     | 0.0177      | 0.0129     | 0.0180      | 0.0133     | 0.0177      | 0.0134     | 0.0177      | 0.0133     | 0.0176      |
| B (x,y,z)   | 0.4949,    | 0.5000,     | 0.5000,     | 0.4941,    | 0.5000      | 0.4819,    | 0.5001      | 0.4892,    | 0.5001      | 0.4945,    | 0.5003      | 0.4871,    | 0.5001      | 0.4881,    | 0.5000      | 0.4846,    | 0.5000      |
|             | 0.4949,    | 0.0000,     | 0.5000,     | 0.4941,    | 0.5001,     | 0.4819,    | 0.5001,     | 0.4892,    | 0.5001,     | 0.4945,    | 0.5003,     | 0.4871,    | 0.5001,     | 0.4881,    | 0.5001,     | 0.4846,    | 0.5001,     |
|             | 0.4949     | 0.4949      | 0.4950      | 0.4941     | 0.4946      | 0.4819     | 0.4825      | 0.4892     | 0.4898      | 0.4945     | 0.4956      | 0.4871     | 0.4877      | 0.4881     | 0.4889      | 0.4846     | 0.4851      |
| O1 (x,y,z)  | 0.5247,    | 0.0000,     | 0.4998,     | 0.5244,    | 0.5004      | 0.5115,    | 0.5001      | 0.5192,    | 0.5001      | 0.5243,    | 0.4919      | 0.5170,    | 0.4999      | 0.5181,    | 0.5001      | 0.5143,    | 0.5001      |
|             | 0.5247,    | -0.0001     | 0.4995,     | 0.5244,    | 0.4999,     | 0.5115,    | 0.4997,     | 0.5192,    | 0.4997,     | 0.5243,    | 0.4905,     | 0.5170,    | 0.4996,     | 0.5181,    | 0.4999,     | 0.5143,    | 0.4997      |
|             | 0.0324     | 0.5309      | 0.0434      | 0.0328     | 0.0437      | 0.0321     | 0.0426      | 0.0326     | 0.0432      | 0.0329     | 0.0403      | 0.0325     | 0.0429      | 0.0325     | 0.0431      | 0.0323     | 0.0428      |
| O2 (x,y,z)  |            | 0.4997,     | 0.4999,     |            | 0.4995,     |            | 0.4995,     |            | 0.4995,     |            | 0.4924,     |            | 0.4996,     |            | 0.4997,     |            | 0.4996      |
|             | -          | 0.2449,     | -0.0026     | -          | 0.0003,     | -          | 0.0001,     | -          | 0.0001,     | -          | 0.0002,     | -          | 0.0001,     | -          | 0.0001,     | -          | 0.0002      |
|             |            | 0.2812      | 0.5345      |            | 0.5337      |            | 0.5205      |            | 0.5283      |            | 0.5312      |            | 0.5261      |            | 0.5273      |            | 0.5234      |

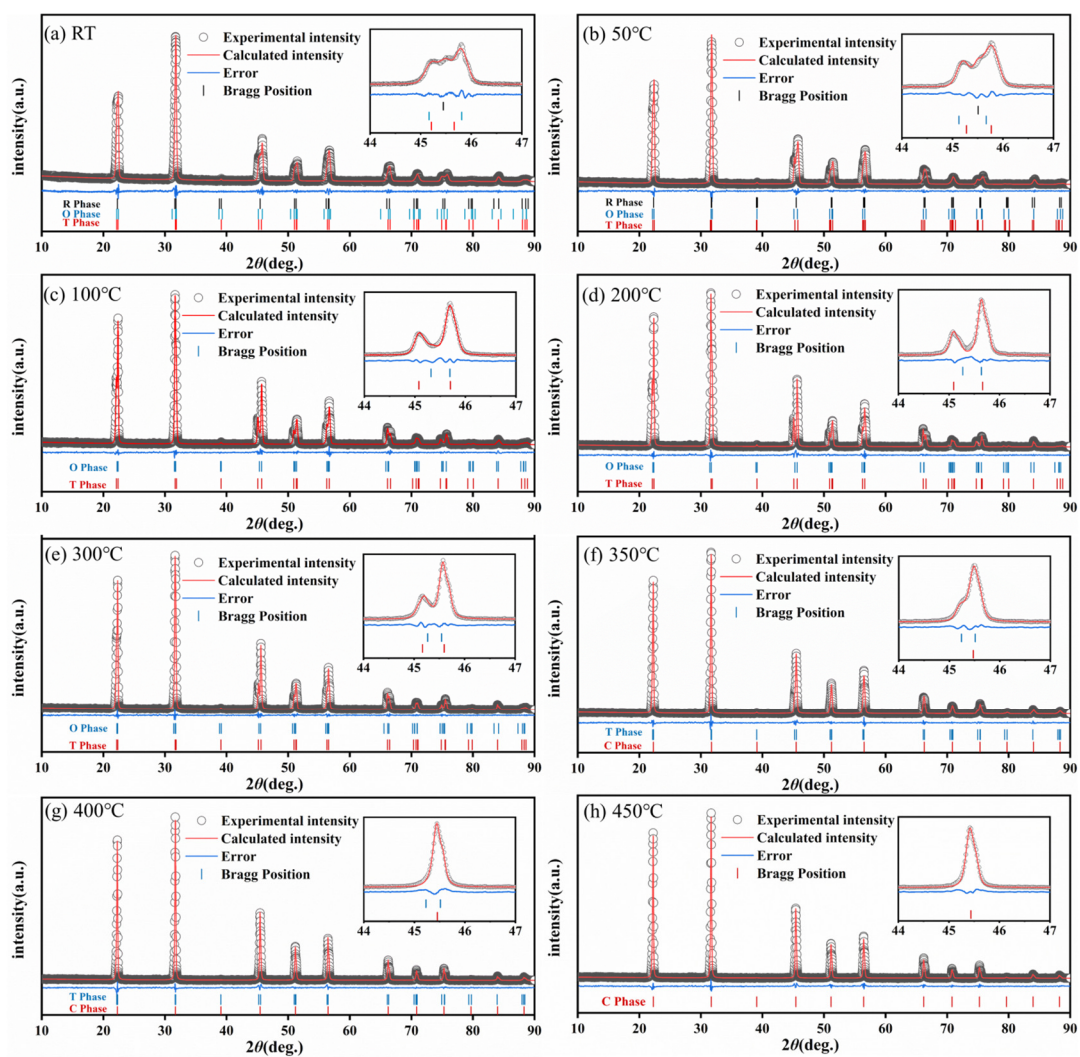

**Figure S4** (a)-(h) the Rietveld refinement for KNN-UN from room temperature to 450°C

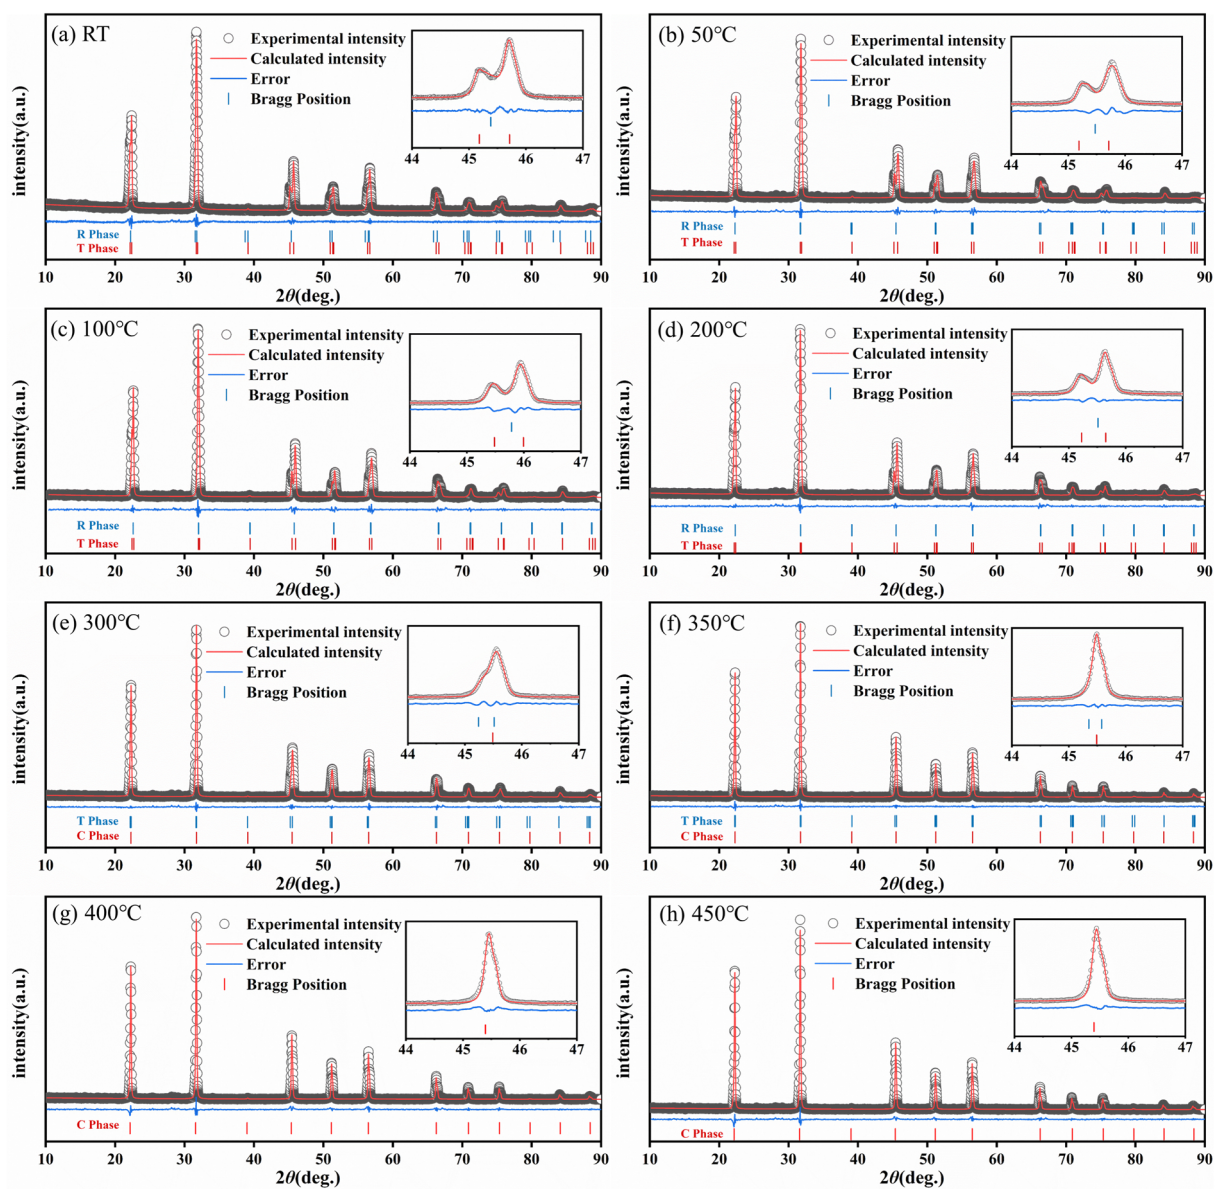

**Figure S5** (a)-(h) the Rietveld refinement for KNN-800 from room temperature to 450°C

**Table S3** Parameters of KNN-UN from room temperature to 450 °C obtained from Rietveld refinement

| Parameter<br>s | Room temperature |             |             | 50°C       |             |             | 100°C       |             |             | 200°C       |             | 300°C       |             | 350°C      |             | 400°C      |            | 450°C   |
|----------------|------------------|-------------|-------------|------------|-------------|-------------|-------------|-------------|-------------|-------------|-------------|-------------|-------------|------------|-------------|------------|------------|---------|
| sig            | 1.52             |             |             | 1.67       |             |             | 1.59        |             |             | 1.60        |             | 1.58        |             | 1.74       |             | 1.57       |            | 1.92    |
| $R_w(\%)$      | 4.06             |             |             | 8.57       |             |             | 8.15        |             |             | 8.22        |             | 8.13        |             | 8.99       |             | 8.12       |            | 9.98    |
| Symmetry       | R Phase          | O Phase     | T Phase     | R Phase    | O Phase     | T Phase     | O Phase     | T Phase     | O Phase     | T Phase     | O Phase     | T Phase     | T Phase     | C Phase    | T Phase     | C Phase    | C Phase    |         |
| proportion     | 33.5%            | 46.7%       | 19.8%       | 2.3%       | 66.1%       | 31.6%       | 44.5%       | 53.5%       | 32.3%       | 67.7%       | 11.7%       | 81.3%       | 64.3%       | 35.7%      | 8.7%        | 91.3%      | 100%       |         |
| Space<br>group | <i>R3m</i>       | <i>Amm2</i> | <i>P4mm</i> | <i>R3m</i> | <i>Amm2</i> | <i>P4mm</i> | <i>Amm2</i> | <i>P4mm</i> | <i>Amm2</i> | <i>P4mm</i> | <i>Amm2</i> | <i>P4mm</i> | <i>P4mm</i> | <i>P23</i> | <i>P4mm</i> | <i>P23</i> | <i>P23</i> |         |
| a(Å)           | 3.9885           | 3.9581      | 3.9704      | 3.9831     | 3.9618      | 3.9700      | 3.9680      | 3.9673      | 3.9723      | 3.9701      | 3.9802      | 3.9759      | 3.9827      | 3.9860     | 3.9826      | 3.9876     | 3.9893     |         |
| b(Å)           | 3.9885           | 5.7336      | 3.9704      | 3.9831     | 5.6693      | 3.9700      | 5.6673      | 3.9673      | 5.6405      | 3.9701      | 5.6916      | 3.9759      | 3.9827      | 3.9860     | 3.9826      | 3.9876     | 3.9893     |         |
| c(Å)           | 3.9885           | 5.6151      | 4.0077      | 3.9831     | 5.6511      | 4.0148      | 5.6432      | 4.0192      | 5.6813      | 4.0179      | 5.6312      | 4.0115      | 4.0055      | 3.9860     | 4.0065      | 3.9876     | 3.9893     |         |
| Alpha(°)       | 89.6780          | 90.0000     | 90.0000     | 89.8527    | 90.0000     | 90.0000     | 90.0000     | 90.0000     | 90.0000     | 90.0000     | 90.0000     | 90.0000     | 90.0000     | 90.0000    | 90.0000     | 90.0000    | 90.0000    |         |
| A (x,y,z)      | 0.0129,          | 0.0000,     | 0.0000,     | 0.0132,    | 0.0000,     | 0.0000,     | 0.0000,     | 0.0000,     | 0.0000,     | 0.0000,     | 0.0000,     | 0.0000,     | 0.0000,     | -0.0029,   | 0.0003,     | -0.0012    | 0.0000,    | 0.0000, |
|                | 0.0129,          | 0.0001,     | 0.0000,     | 0.0128,    | 0.0000,     | -0.0002     | 0.0002,     | 0.0000,     | 0.0001,     | 0.0000,     | 0.0003,     | 0.0000,     | 0.0000,     | -0.0043,   | 0.0002,     | -0.0012    | 0.0000,    | 0.0000, |
|                | 0.0129           | 0.0137      | 0.0178      | 0.0127     | 0.0137      | 0.0179      | 0.0137      | 0.0178      | 0.0139      | 0.0180      | 0.0138      | 0.0181      | 0.0168      | 0.0182     | 0.0175      | 0.0180     | 0.0180     |         |
| B (x,y,z)      | 0.4949,          | 0.5000,     | 0.5000,     | 0.5001,    | 0.5000,     | 0.5001,     | 0.5000,     | 0.5000,     | 0.5000,     | 0.5000,     | 0.5000,     | 0.5000,     | 0.5000,     | 0.5022,    | 0.4973,     | 0.5013,    | 0.4987,    | 0.5000, |
|                | 0.4949,          | 0.0000,     | 0.5000,     | 0.5001,    | 0.0000,     | 0.5001,     | 0.0000,     | 0.5000,     | 0.0000,     | 0.5000,     | 0.0000,     | 0.5000,     | 0.5022,     | 0.4973,    | 0.5013,     | 0.4987,    | 0.5000,    |         |
|                | 0.4949           | 0.4949      | 0.4950      | 0.5001     | 0.4989      | 0.4989      | 0.4963      | 0.4950      | 0.5009      | 0.5009      | 0.5003      | 0.5002      | 0.5011      | 0.4973     | 0.5003      | 0.4987,    | 0.5000,    |         |
| O1 (x,y,z)     | 0.5247,          | 0.0000,     | 0.4998,     | 0.5298,    | -0.0002     | 0.4996,     | -0.0002     | 0.4998,     | -0.0004     | 0.5001,     | -0.0004,    | 0.5001,     | 0.4995,     | 0.5004,    | 0.5025      | 0.5002,    | 0.5000,    |         |
|                | 0.5247,          | -0.0001     | 0.4995,     | 0.5298,    | -0.0003     | 0.4996,     | -0.0001     | 0.4995,     | -0.0002     | 0.5000,     | -0.0003,    | 0.4993,     | 0.4916,     | 0.5004,    | 0.5025      | 0.5002,    | 0.5000,    |         |
|                | 0.0324           | 0.5309      | 0.0434      | 0.0331     | 0.5347      | 0.0435      | 0.5320      | 0.0434      | 0.5374      | 0.0441      | 0.5360      | 0.0439      | 0.0418      | 0.0442     | 0.0434      | 0.0441     | 0.0440     |         |
| O2 (x,y,z)     |                  | 0.4997,     | 0.4999,     |            | 0.4999,     | 0.4998,     | 0.4951,     | 0.4999,     | 0.5004,     | 0.4999,     | 0.4986,     | 0.4998,     | 0.4950,     | 0.5012,    | 0.4992,     | 0.5001,    | 0.5000,    |         |
|                | -                | 0.2449,     | -0.0026     | -          | 0.2468,     | -0.0001     | 0.2452,     | -0.0026     | 0.2477,     | 0.0000,     | 0.2470,     | 0.0003,     | 0.0017,     | 0.0005,    | 0.0001,     | 0.0001,    | 0.0000,    |         |
|                |                  | 0.2812      | 0.5345      |            | 0.2833      | 0.5384      | 0.2820      | 0.5345      | 0.2845      | 0.5409      | 0.2840      | 0.5398      | 0.5370      | 0.5403     | 0.5388      | 0.5400     | 0.5400     |         |

**Table S4** Parameters of KNN-800 from room temperature to 450 °C obtained from Rietveld refinement

| Parameters  | Room temperature |             | 50°C       |             | 100°C      |             | 200°C      |             | 300°C       |            | 350°C       |            | 400°C      | 450°C      |
|-------------|------------------|-------------|------------|-------------|------------|-------------|------------|-------------|-------------|------------|-------------|------------|------------|------------|
| sig         | 1.58             |             | 1.73       |             | 1.60       |             | 1.86       |             | 1.79        |            | 1.81        |            | 1.99       | 1.92       |
| $R_w(\%)$   | 4.23             |             | 9.40       |             | 8.22       |             | 9.71       |             | 9.82        |            | 9.95        |            | 9.95       | 9.90       |
| Symmetry    | R Phase          | T Phase     | R Phase    | T Phase     | R Phase    | T Phase     | R Phase    | T Phase     | T Phase     | C Phase    | T Phase     | C Phase    | C Phase    | C Phase    |
| proportion  | 47.4%            | 52.6%       | 51.4%      | 48.6%       | 22.5%      | 77.5%       | 17.7%      | 86.3%       | 61.3%       | 38.7%      | 6.7%        | 93.3%      | 100%       | 100%       |
| Space group | <i>R3m</i>       | <i>P4mm</i> | <i>R3m</i> | <i>P4mm</i> | <i>R3m</i> | <i>P4mm</i> | <i>R3m</i> | <i>P4mm</i> | <i>P4mm</i> | <i>P23</i> | <i>P4mm</i> | <i>P23</i> | <i>P23</i> | <i>P23</i> |
| a(Å)        | 3.9937           | 3.9664      | 3.9860     | 3.9663      | 3.9853     | 3.9679      | 3.9829     | 3.9715      | 3.9773      | 3.9842     | 3.9774      | 3.9848     | 3.9759     | 3.9759     |
| b(Å)        | 3.9937           | 3.9664      | 3.9860     | 3.9663      | 3.9853     | 3.9769      | 3.9829     | 3.9715      | 3.9773      | 3.9842     | 3.9774      | 3.9848     | 3.9759     | 3.9759     |
| c(Å)        | 3.9937           | 4.0104      | 3.9860     | 4.0097      | 3.9853     | 4.0103      | 3.9829     | 4.0067      | 4.0010      | 3.9842     | 3.9961      | 3.9848     | 4.0115     | 4.0115     |
| Alpha(°)    | 89.5922          | 90.0000     | 89.8595    | 90.0000     | 90.0405    | 90.0000     | 89.9544    | 90.0000     | 90.0000     | 90.0000    | 90.0000     | 90.0000    | 90.0000    | 90.0000    |
| A (x,y,z)   | 0.0135,          | 0.0000,     | 0.0136,    | 0.0000,     | 0.0141,    | 0.0000,     | 0.0134,    | 0.0000,     | -0.0006,    | 0.0000,    | -0.0001,    | 0.0000,    | 0.0000,    | 0.0000,    |
|             | 0.0135,          | -0.0002,    | 0.0136,    | 0.0000,     | 0.0141,    | -0.0002,    | 0.0134,    | -0.0001,    | -0.0006,    | 0.0000,    | -0.0003,    | 0.0000,    | 0.0000,    | 0.0000,    |
|             | 0.0135           | 0.0177      | 0.0136     | 0.181       | 0.0141     | 0.0188      | 0.0134     | 0.0180      | 0.0175      | 0.0180     | 0.0178      | 0.0180     | 0.0181     | 0.0181     |
| B (x,y,z)   | 0.4892,          | 0.5001      | 0.5022,    | 0.5000,     | 0.5245,    | 0.5001,     | 0.5000,    | 0.5001,     | 0.5003,     | 0.4992,    | 0.5002,     | 0.4992,    | 0.5000,    | 0.5000,    |
|             | 0.4892,          | 0.5001,     | 0.5022,    | 0.5000,     | 0.5245,    | 0.5001,     | 0.5001,    | 0.5001,     | 0.5004,     | 0.4992,    | 0.5003,     | 0.4992,    | 0.5000,    | 0.5000,    |
|             | 0.4892           | 0.4898      | 0.5022     | 0.5028      | 0.5245     | 0.5048      | 0.5001     | 0.5001      | 0.5003      | 0.4992     | 0.5002      | 0.4992     | 0.5002     | 0.5002     |
| O1 (x,y,z)  | 0.5192,          | 0.5001      | 0.5338,    | 0.5000,     | 0.5563,    | 0.4997,     | 0.5300,    | 0.4997,     | 0.5031,     | 0.5002,    | 0.4991,     | 0.5002,    | 0.5001,    | 0.5001,    |
|             | 0.5192,          | 0.4997,     | 0.5338,    | 0.5000,     | 0.5563,    | 0.4997,     | 0.5299,    | 0.4997,     | 0.5031,     | 0.5002,    | 0.4991,     | 0.5002,    | 0.4993,    | 0.4993,    |
|             | 0.0326           | 0.0432      | 0.0328     | 0.0442      | 0.0347     | 0.0458      | 0.0330     | 0.0437      | 0.0441      | 0.0439     | 0.0435      | 0.0441     | 0.0439     | 0.0439     |
| O2 (x,y,z)  |                  | 0.4995,     |            | 0.5000,     |            | 0.4998,     |            | 0.4997,     | 0.4971,     | 0.5000,    | 0.4993,     | 0.5000,    | 0.4998,    | 0.4998,    |
|             | -                | 0.0001,     | -          | 0.0000,     | -          | 0.0002,     | -          | 0.0003,     | -0.0001,    | 0.0001,    | 0.0000,     | 0.0001,    | 0.0003,    | 0.0003,    |
|             |                  | 0.5283      |            | 0.5430      |            | 0.5663      |            | 0.5396      | 0.5388      | 0.5400     | 0.5394      | 0.5400     | 0.5398     | 0.5398     |



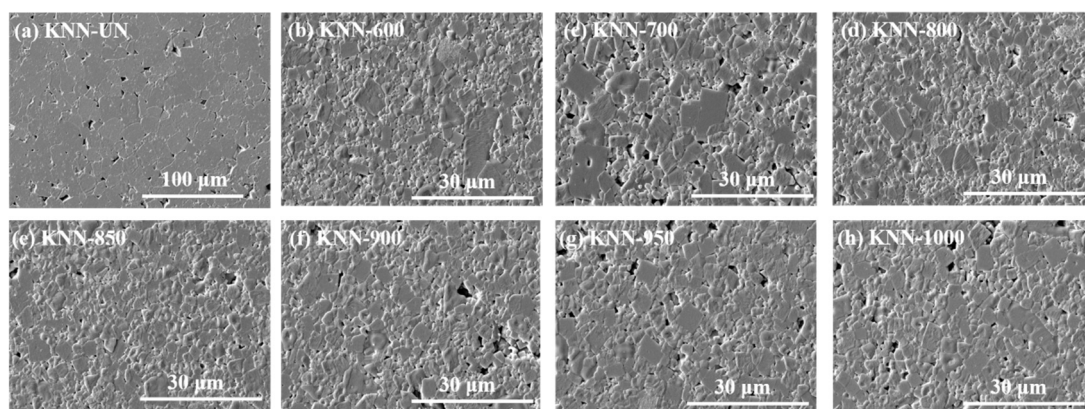

**Figure S6** (a)-(h) Scanning Electron Microscopy (SEM) micrographs for KNN-UN, KNN-600, KNN-700, KNN-800, KNN-850, KNN-900, KNN-950, KNN-1000

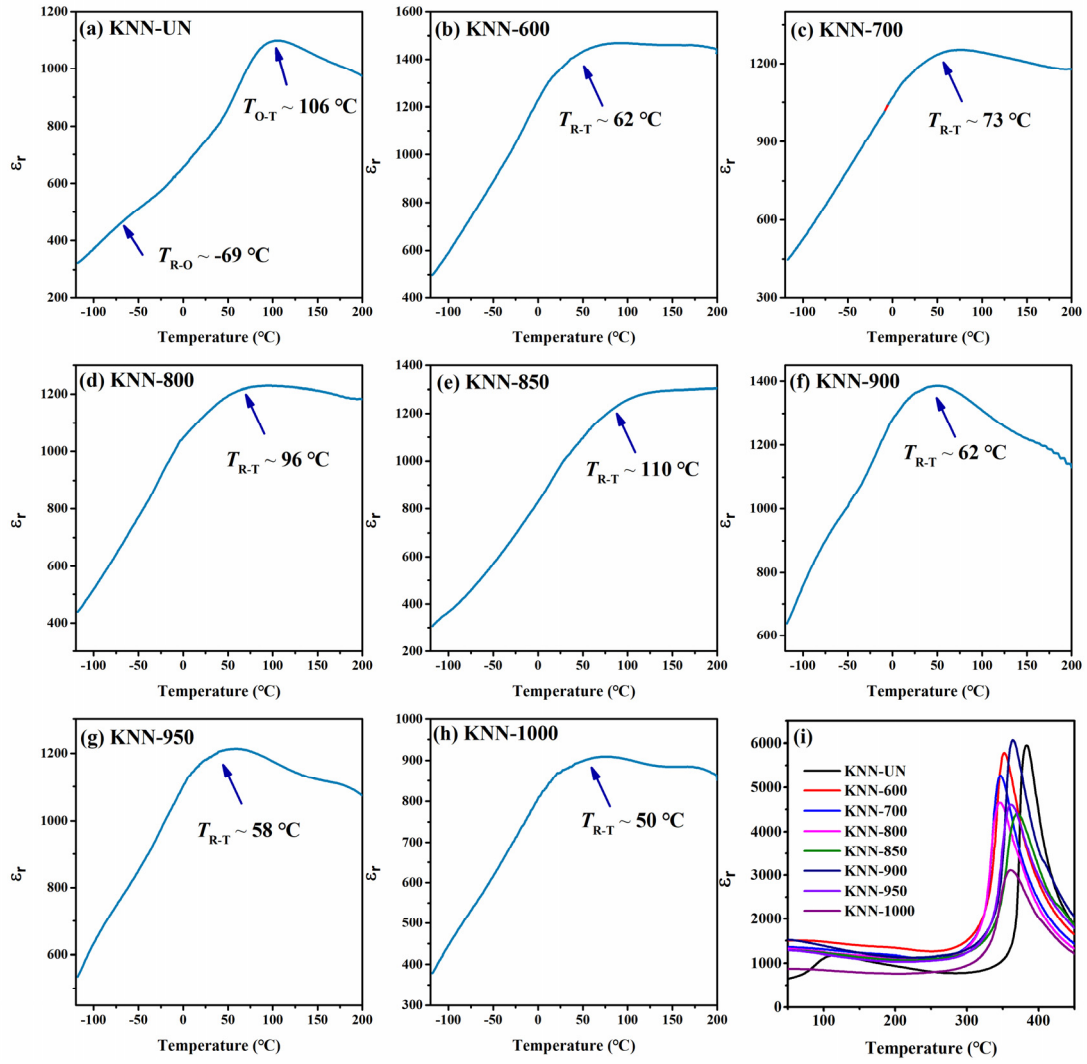

**Figure S7** (a)-(h) The  $\epsilon_r$ - $T$  curves of KNN-UN, KNN-600, KNN-700, KNN-800, KNN-850, KNN-900, KNN-950, KNN-1000 from  $-120^{\circ}\text{C}$  to  $200^{\circ}\text{C}$ ; (i) the  $\epsilon_r$ - $T$  curves of KNN-UN, KNN-600, KNN-700, KNN-800, KNN-850, KNN-900, KNN-950, KNN-1000 from room temperature to  $450^{\circ}\text{C}$

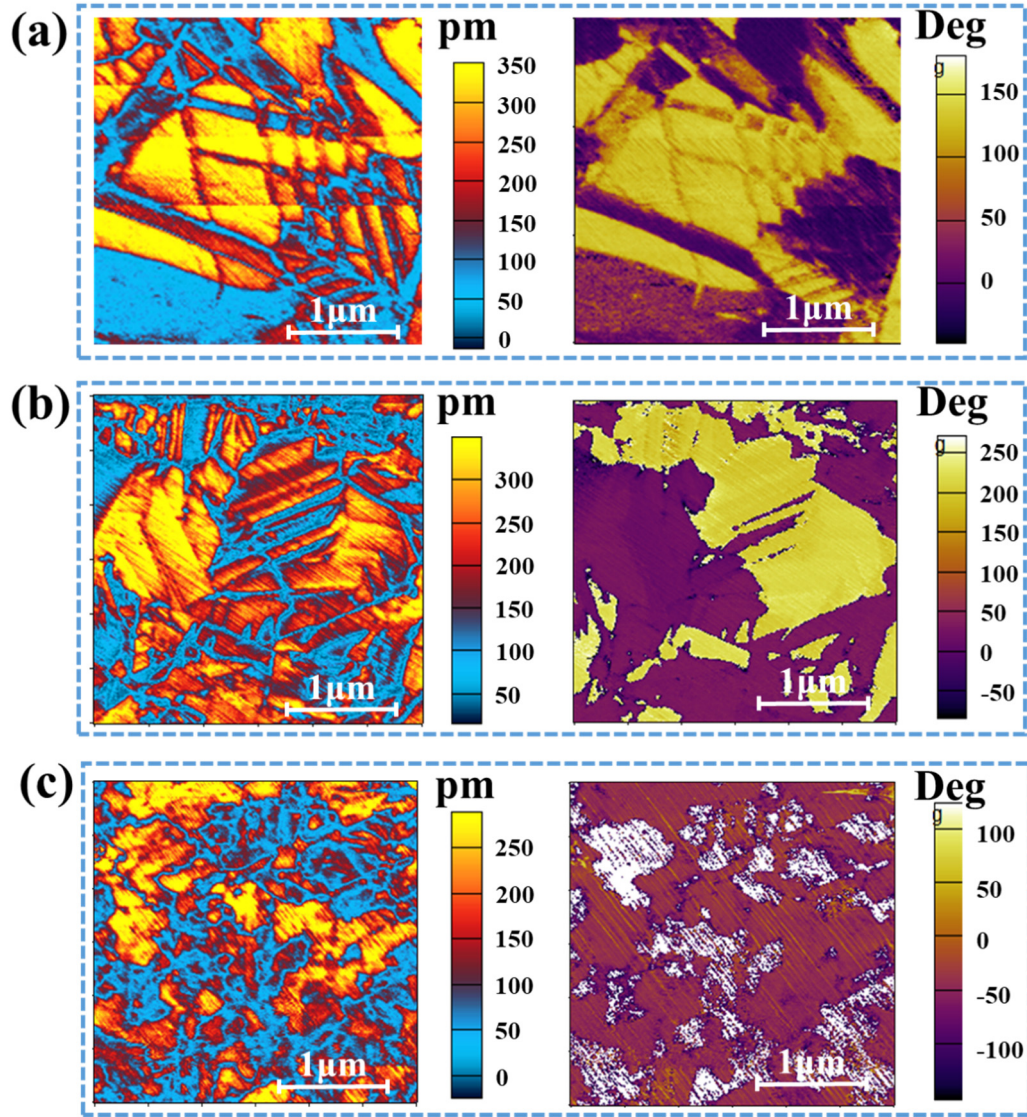

**Figure S8** (a) The piezo-response force microscopy (PFM) amplitude and phase images of KNN with a scan area of  $3 \times 3 \mu\text{m}$ ; (b) the piezo-response force microscopy (PFM) amplitude and phase images of KNN-Fe with a scan area of  $3 \times 3 \mu\text{m}$ ; (c) the piezo-response force microscopy (PFM) amplitude and phase images of KNN-BNZ with a scan area of  $3 \times 3 \mu\text{m}$
